# Supplementary material for: Comparative genomics of Geobacter chemotaxis genes reveals diverse signaling function
Source: PubMed Central journal article supplement (PMC2577667; doi:10.1186/1471-2164-9-471), 2008-10-09
Supplement: 1471-2164-9-471-S1.pdf [file 1471-2164-9-471-S1.pdf]

## Supplementary Figures and Table

### Comparative Genomics of *Geobacter Chemotaxis* Genes Reveals Diverse Signaling Functions

Hoa T. Tran, Julia Krushkal, Frances M. Antommattai, Derek R. Lovley  
and Robert M. Weis

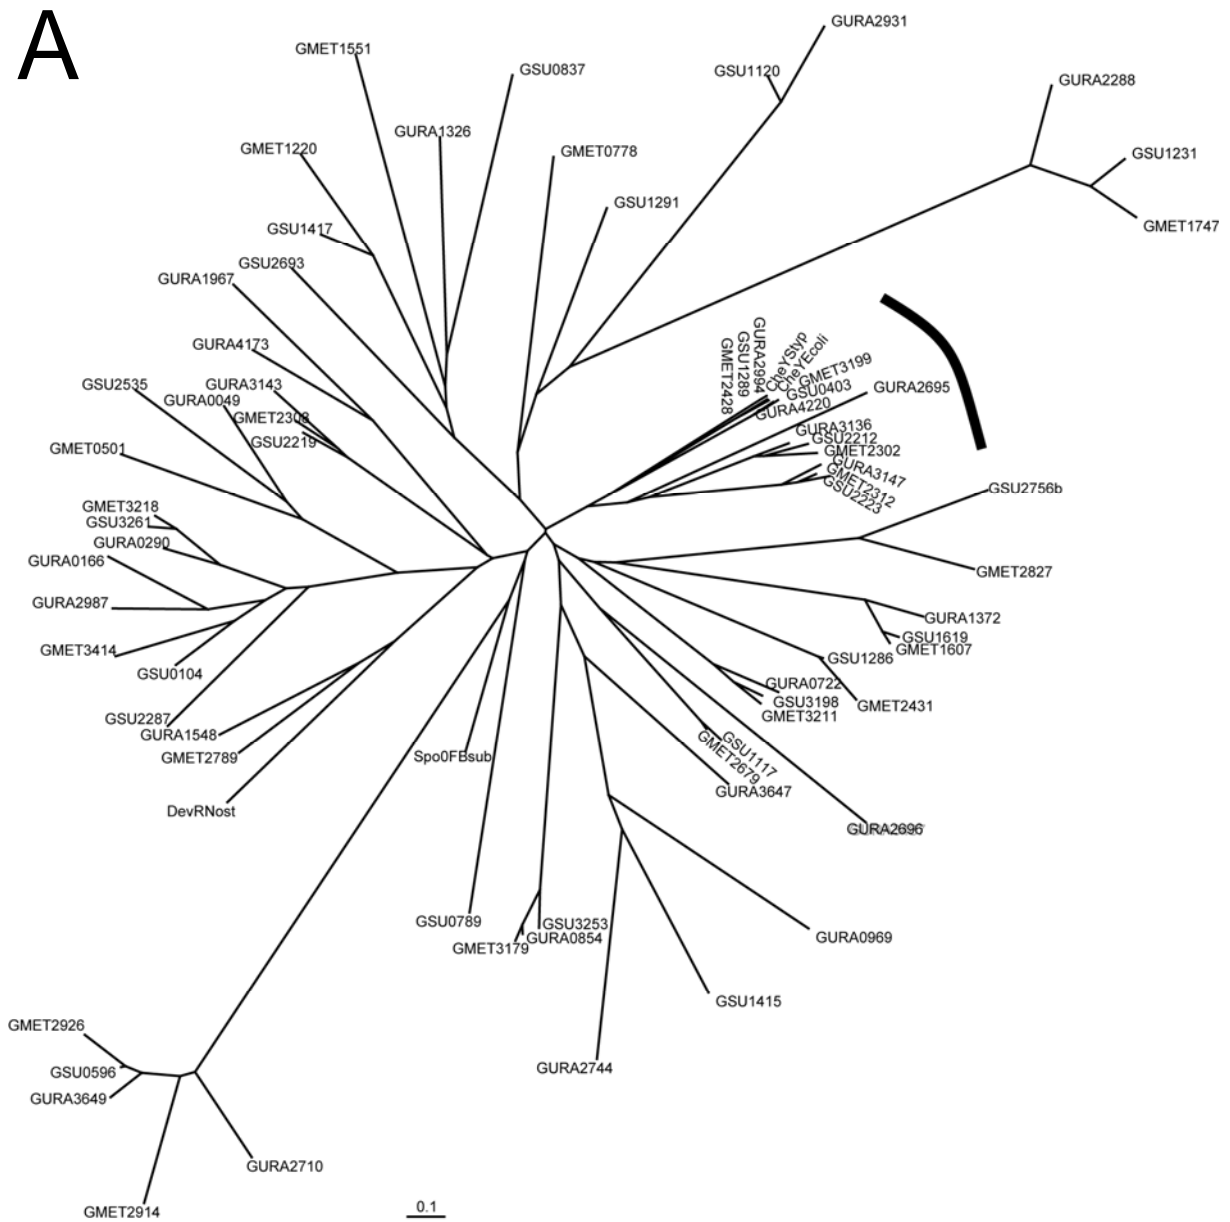

| Species       | <i>Geobacter</i> CheY Homologs                     |                |                                                         |                |
|---------------|----------------------------------------------------|----------------|---------------------------------------------------------|----------------|
|               | <i>cheYs</i> in <i>che</i> and <i>fla</i> clusters |                | <i>cheYs</i> outside <i>che</i> and <i>fla</i> clusters |                |
|               | <i>E. coli</i> Branch                              | Other Branches | <i>E. coli</i> Branch                                   | Other Branches |
| <i>G. sul</i> | 4/7                                                | 3/7            | 0/15                                                    | 18/18          |
| <i>G. met</i> | 4/10                                               | 6/10           | 0/15                                                    | 11/11          |
| <i>G. ura</i> | 5/10                                               | 5/10           | 0/15                                                    | 15/15          |

**Figure S1. The *Geobacter* CheY-like Phylogenetic Tree (A) and the Homolog Distribution within the Tree (B).** (A) A neighbor-joining phylogenetic tree of the *Geobacter* CheY homologs and selected CheY & CheY-like proteins from other species: *E. coli* (Ecoli), *Bacillus subtilis* (Bsub), *Salmonella enterica* subsp. *enterica* serovar Typhi Ty2 (Styp), and *Nostoc* sp. strain ATCC 29133 (Nost). (B) *Geobacter* CheY homolog distributions between the tree branch with *E. coli* CheY and the rest of the phylogenetic tree. ~50% of the homologs situated on the chromosome within the major *che* or flagellar gene clusters reside in the tree branch that contains the *E. coli* and *S. typh* CheYs (marked by a black arc). No CheY homologs situated on the chromosome outside *che* or flagellar gene clusters reside in the same branch with *E. coli* CheY.

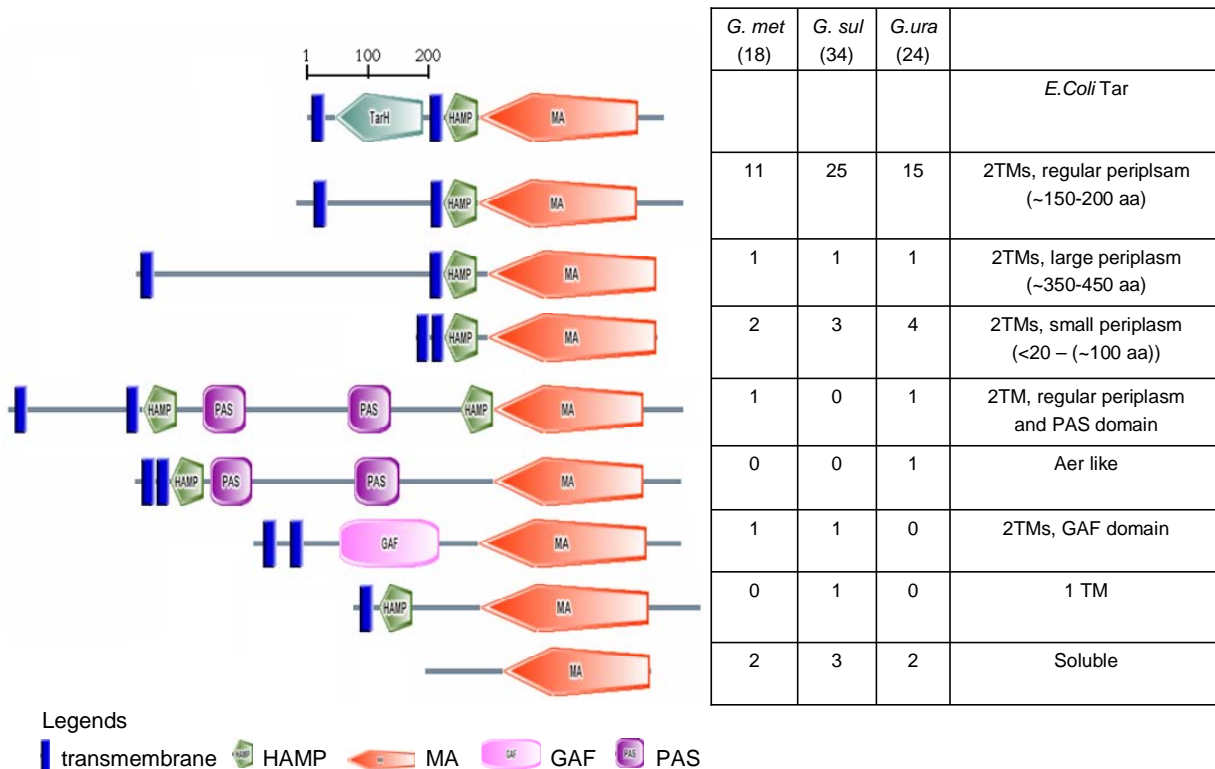

**Figure S2. Domain architectures of MCPs in *Geobacter* sp. show diversity.** *Geobacter* MCPs are classified according to the periplasmic domain size, the length of the methyl-accepting (MA) domain [1] and the presence of the PAS [2] (*gmet2422*, *gura1191*, *gura2989*) or the GAF domain [3] (*gsu1704*, *gmet1641*).

**Table S1. Distribution of *Geobacter* MCPs by number of transmembrane segments & size of periplasmic domains.**

| Number of Transmembrane Helices | Size of Periplasmic Domain (amino acid residues) | MCP of Each Type (%) |              |              |
|---------------------------------|--------------------------------------------------|----------------------|--------------|--------------|
|                                 |                                                  | <i>G.sul</i>         | <i>G.met</i> | <i>G.ura</i> |
| 2                               | Large (250 to 430)                               | 3                    | 0            | 4            |
|                                 | Medium (150 to 200)                              | <b>76</b>            | <b>72</b>    | <b>67</b>    |
|                                 | Small (< 100)                                    | 9                    | 17           | 21           |
| 1                               |                                                  | 3                    | 0            | 0            |
| 0 (Soluble)                     |                                                  | 9                    | 11           | 8            |

**Figure S3. Gene arrangement of *E. coli*-like clusters in *Geobacter* (A, C), with the percent identity of the individual gene products to *E. coli* (B, D)**

**A. Type 1 gene arrangements**

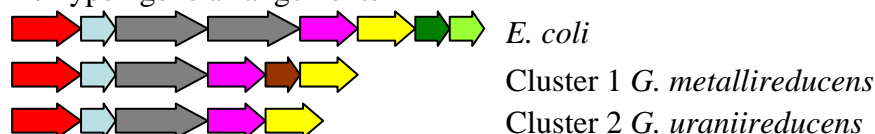

**B. Percent identities of the *Geobacter* Type 1 cluster proteins with *E. coli*.** The MCP identities were determined between the *E. coli* aspartate receptor cytoplasmic domain (c-Tar) and the corresponding c-domains of *Geobacter* MCPs. For CheA, CheW, CheR and CheB the full length gene products were used.

| <i>E. coli</i>                                                              | CheA       | CheW       | Tar Cyt. Domain (c-Tar) | CheR       | CheB       |
|-----------------------------------------------------------------------------|------------|------------|-------------------------|------------|------------|
| <i>G. met</i> (cluster 1)                                                   | 47         | 63         | 53                      | 50         | 62         |
| <i>G. ura</i> (cluster 2)                                                   | 46         | 60         | 53                      | 48         | 60         |
| <b>Mean identities with remaining <i>Geobacter</i> homologs<sup>a</sup></b> |            |            |                         |            |            |
| <i>G. met</i>                                                               | 32 ± 5 (4) | 27 ± 5 (8) | 29 ± 6 (7)              | 29 ± 5 (5) | 37 ± 8 (5) |
| <i>G. ura</i>                                                               | 32 ± 3 (6) | 27 ± 4 (6) | 27 ± 6 (7)              | 32 ± 4 (7) | 41 ± 7 (5) |

<sup>a</sup>mean ± standard deviation (number of homologs in the average); including Type 2 clusters.

**C. Type 2 gene arrangements**

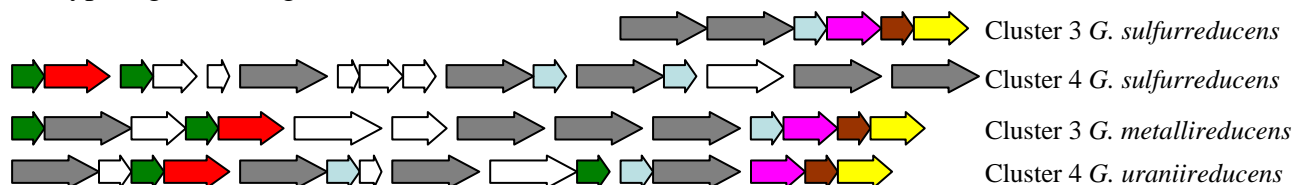

**D.** Percent identities determined between the gene products of Type 2 clusters and *E. coli* proteins (as described in S3 B). For CheW and CheY, the percent identities of both loci are reported. For the MCPs, the mean and standard deviation of the identities are reported, and the number of sequences used is in parentheses.

| <i>E. coli</i>                                                              | CheA       | CheW         | c-Tar <sup>a</sup> | CheR       | CheB       | CheY       |
|-----------------------------------------------------------------------------|------------|--------------|--------------------|------------|------------|------------|
| <i>G. sul</i> (clusters 3 & 4)                                              | 37         | 33 ± 1.5 (3) | 35 ± 3 (7)         | 41         | 50         | 26, 37     |
| <i>G. met</i> (cluster 3)                                                   | 36         | 31           | 33 ± 1 (3)         | 38         | 50         | 23, 37     |
|                                                                             |            |              | 15 (1)             |            |            |            |
| <i>G. ura</i> (cluster 4)                                                   | 35         | 29, 30       | 32 ± 1 (3)         | 37         | 50         | 25, 35     |
|                                                                             |            |              | 14 (1)             |            |            |            |
| <b>Mean identities with remaining <i>Geobacter</i> homologs<sup>b</sup></b> |            |              |                    |            |            |            |
| <i>G. sul</i>                                                               | 32 ± 2 (3) | 27 ± 7 (6)   | 25 (1)             | 29 ± 5 (3) | 38 (2)     | 29 ± 3 (4) |
| <i>G. met</i>                                                               | 30 ± 6 (3) | 27 ± 4 (5)   | 29 ± 1 (3)         | 26 ± 7 (4) | 35 ± 3 (4) | 29 ± 5 (5) |
| <i>G. ura</i>                                                               | 32 ± 4 (5) | 26 ± 5 (6)   | 27 ± 2 (3)         | 27 ± 6 (6) | 37 ± 3 (4) | 26 ± 7 (6) |

<sup>a</sup>mean ± standard deviation (number of homologs in average). One c-domain of lower identity, as noted, was excluded from the average.

<sup>b</sup>mean ± standard deviation (number of homologs in average); excluding Type 1 clusters.

**Figure S4. Gene arrangement of the *dif*-like clusters in *Geobacter* species (A) and the percent identity of the individual gene products in the cluster (B)**

**A.** Gene arrangement

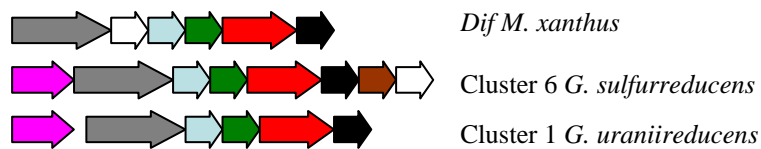

**B.** Percent identities of full-length gene products in the *Geobacter dif*-like clusters to *M. xanthus dif*-homolog proteins. (The *E. coli* homologs are indicated in parentheses; c-DifA refers to the c-domain of the *M. xanthus* MCP.)

| <i>M. Xanthus</i>                                                           | c-DifA (MCP) | DifB       | DifC (CheW) | DifD (CheY) | DifE (CheA) | DifG (CheC) |
|-----------------------------------------------------------------------------|--------------|------------|-------------|-------------|-------------|-------------|
| <i>G. sul</i> (clust. 6)                                                    | 38           | No homolog | 18          | 54          | 43          | 33          |
| <i>G. ura</i> (clust. 1)                                                    | 38           | No homolog | 21          | 52          | 41          | 31          |
| <b>Mean identities with remaining <i>Geobacter</i> clusters<sup>a</sup></b> |              |            |             |             |             |             |
| <i>G. sul</i>                                                               | 27 ± 3 (7)   |            | 17 ± 2 (6)  | 28 ± 4 (5)  | 28 ± 4 (3)  | No homolog  |
| <i>G. ura</i>                                                               | 23 ± 4 (5)   |            | 16 ± 4 (7)  | 24 ± 6 (8)  | 28 ± 4 (6)  | No homolog  |

<sup>a</sup>mean ± standard deviation (number of homologs in average).

**Figure S5. Gene arrangements in *Geobacter* clusters containing *cheA/Y* fusions compared to other species whose functions have been identified (A), and the percent identities of *cheA/Y* fusions (B)**

**A. Gene arrangement**

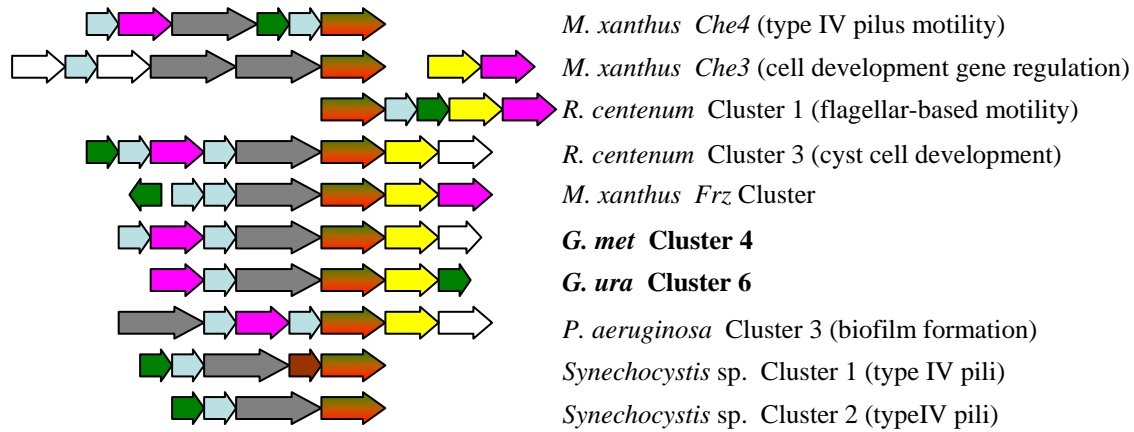

**B. Percent identities between *Geobacter* CheAY fusions with fusions in other species.**

| Species and Cluster            | Protein Name | Identity (%)    |                 |
|--------------------------------|--------------|-----------------|-----------------|
|                                |              | <i>Gura4171</i> | <i>Gmet2710</i> |
| <i>M. xanthus</i> Frz Cluster  | FrzE         | 33              | 28              |
| <i>P. aeruginosa</i> Cluster 3 | WspE         | 30              | 29              |
| <i>R. centenum</i> Cluster 3   | CheA3        | 30              | 32              |
| <i>Synechocystis</i> Cluster 1 | TaxAY1       | 30              | 27              |
| <i>R. centenum</i> Cluster 1   | CheA1        | 29              | 26              |
| <i>M. xanthus</i> Cluster 3    | CheA3        | 27              | 29              |
| <i>Synechocystis</i> Cluster 2 | TaxAY2       | 25              | 24              |

**Figure S6. Gene arrangement of other *che* clusters**

**Group  $\alpha$ : *che* cluster conserved among *Geobacteraceae***

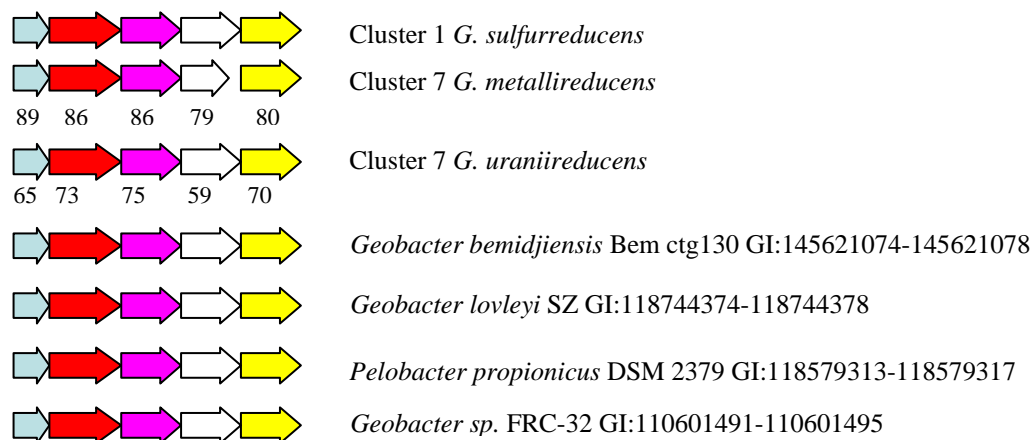

Percent identities of the full-length *G. metallireducens* and *G. uraniireducens* gene products compared to *G. sulfurreducens* are shown below the *metallireducens* and *uraniireducens* clusters. Clusters found in other *Geobacteraceae* are shown with the corresponding NCBI Gene Identifier numbers or locus tags on the right.

**Group  $\beta$ : *che* cluster conserved among *delta-proteobacteria***

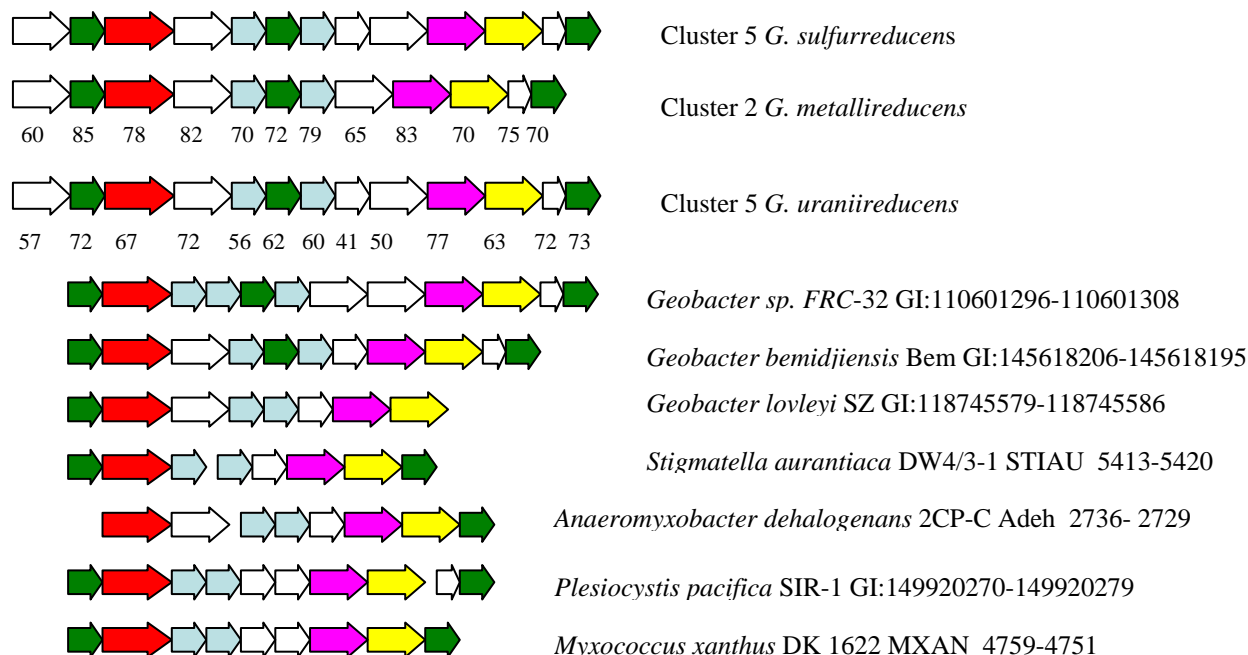

Numbers below each gene are percent identities of the full-length *G. metallireducens* and *G. uraniireducens* gene products compared to *G. sulfurreducens*. The clusters found in other  $\delta$ -*proteobacteria* are shown with the corresponding NCBI Gene Identifier numbers or locus tags on the right.

**Figure S7. Chromosome locations of  $\sigma^{54}$  regulation elements in *G. sulfurreducens* upstream of *che* and flagellar gene operons**

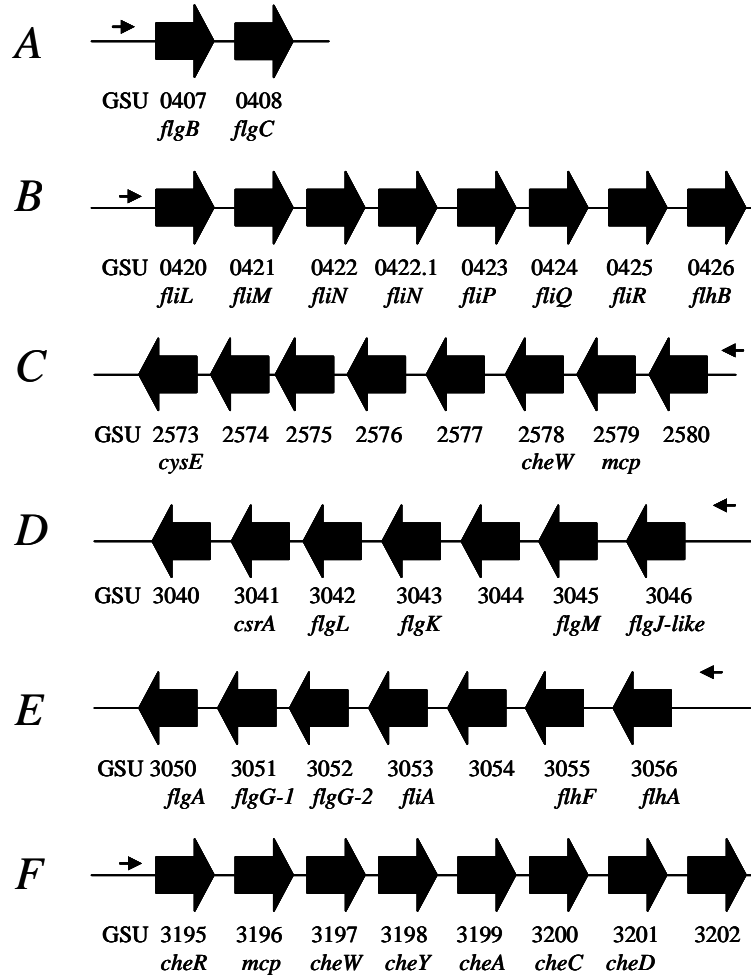

| Fig.                            | $\sigma^{54}$ sequence | Score | Position        | Operon               | Bases from 1 <sup>st</sup> ATG |
|---------------------------------|------------------------|-------|-----------------|----------------------|--------------------------------|
| A                               | CTGGTACGGCTTTTGCT      | 92    | 439442-439458   | <i>Gsu0407-0408</i>  | 23                             |
| B                               | CTGGCATTTCGGTTGCA      | 86    | 451031-451047   | <i>Gsu0420-0426</i>  | 47                             |
|                                 | ATGGCACGGCCTGTGTA      | 81    | 773999-774015   | <i>Gsu0725-0726</i>  | 26                             |
| C                               | TTGGCATCCTGCCTGCT      | 81    | 2842557-2842541 | <i>Gsu2573-2580</i>  | 48                             |
|                                 | TCGGCACGTAGGTTGCA      | 86    | 3311556-3311572 | <i>Gsu3017-3028</i>  | 48                             |
| D                               | TTGGCACATAACATGCT      | 86    | 3350142-3350126 | <i>Gsu3040-3046</i>  | 48                             |
| E                               | CTGGCACAACGGTTGCA      | 93    | 3359815-3359799 | <i>Gsu3050-3056</i>  | 39                             |
|                                 | ACGGCACCGGCATTGCC      | 80    | 3462928-3462944 | <i>Gsu3156 (mcp)</i> | 115                            |
| F*                              | ACGGAACACTTCTTGCT      | 81    | 3503117-3503133 | <i>Gsu3195-3202*</i> | 16                             |
| CTGGCAC-4N-TTTGCA/T (consensus) |                        |       |                 |                      |                                |

\**Gsu3195-3202* is *G. sulfurreducens che* gene cluster 6 (Figure 1).

### **Supporting Materials References**

1. LeMoual H, Quang T, Koshland DE: **Methylation of the Escherichia coli chemotaxis receptors: Intra- and interdimer mechanisms.** *Biochemistry* 1997, **36**:13441-13448.
2. Ponting CP, Aravind L: **PAS: a multifunctional domain family comes to light.** *Curr Biol* 1997, **7**:R674-677.
3. Aravind L, Ponting CP: **The GAF domain: an evolutionary link between diverse phototransducing proteins.** *Trends Biochem Sci* 1997, **22**:458-459.
